# Supplementary material
Source: ML conference proceedings conference paper supplement (https://openaccess.thecvf.com/content/CVPR2021/html/Chen_One-Shot_Neural_Ensemble_CVPR_2021_paper.html)
Supplement: Supplementary file 1 [file Chen_One-Shot_Neural_Ensemble_CVPR_2021_supplemental.pdf]

# One-Shot Neural Ensemble Architecture Search by Diversity-Guided Search Space Shrinking

## — Supplementary Material —

Minghao Chen<sup>1\*</sup>, Jianlong Fu<sup>2</sup>, Haibin Ling<sup>1</sup>

<sup>1</sup>Stony Brook University    <sup>2</sup>Microsoft Research Asia

{minghao.chen, haibin.ling}@stonybrook.edu, jianf@microsoft.com

### Appendix A

In this appendix, we include: (I) proof of the property stated in Section 3.2, (II) the detailed supernet structure and search space.

#### A-I: Proof of Diversity Score Property

In this section, we show a more detailed formula of the property stated in Section 3.2 and the proof of the property.

**Property:** Assume that  $h_m := (o_{1,m}, \dots, o_{j,m}, \dots, o_{K,m})$  and  $h'_m := (o_{1,m}, \dots, o'_{j,m}, \dots, o_{K,m})$  are different only by  $j$ th operator. Denote the indexes of operators in  $h_m$  and  $h'_m$  as  $\sigma_1, \sigma_2, \dots, \sigma_K$  and  $\sigma'_1, \sigma'_2, \dots, \sigma'_K$ . If  $S_{i,k}^m < S_{i',k}^m$  for  $k = 1, 2, \dots, K$  and  $r_i^m > r_{i'}^m$ , then we have:

$$\text{Score}(h_m) > \text{Score}(h'_m), \tag{1}$$

where  $\sigma_j$  and  $\sigma'_j$  equal to  $i$  and  $i'$ .

**Proof:** Given the property of matrix determinant and definition of  $L_m^y$ , the diversity score of  $h_m$  could be expressed as:

$$\text{Score}(h_m) = \prod_{i=1}^K r_{\sigma_i}^2 \cdot \det(S_m^y). \tag{2}$$

where  $S_m^y$  are the corresponding submatrixs of  $h_m$  in  $S_m$ .

According to the assumption, we know that  $\prod_{i=1}^K r_{\sigma_i}^2 > \prod_{i=1}^K r_{\sigma'_i}^2$ . Now, if  $\det(S_m^y)$  is greater than  $\det(S_m^{y'})$  then the property holds easily. Because  $h_m$  and  $h'_m$  are only different by the  $j$ th operator and  $S_m$  is a symmetry matrix, the number of total different entries between  $S_m^y$  and  $S_m^{y'}$  is less than  $2K$ . We could construct a series of matrixs  $B_i \in \mathbb{R}^{K \times K}$ ,  $i = 0, 1, 2, \dots, K$  as following:

$$B_i(k, l) = \begin{cases} S_m^y(k, l), & k < i, l = j, \\ S_m^y(k, l), & l < i, k = j, \\ S_m^{y'}(k, l), & \text{Otherwise,} \end{cases} \tag{3}$$

where  $B_i(k, l)$  is the entry in row  $k$  column  $l$ . We then prove the following inequality by induction:

$$\det(B_i) \leq \det(B_{i+1}), i = 0, 1, 2, \dots, K - 1. \tag{4}$$

---

\*This work is done when Minghao is an intern at Microsoft.

For  $i = 0$ , consider matrix  $A$  defined as follow:

$$A(k, l) = \begin{cases} \frac{S_m^y(1, j)}{S_m^{y'}(1, j)}, & k = 1, l = j, \\ \frac{S_m^y(j, 1)}{S_m^{y'}(j, 1)}, & l = 1, k = j, \\ 1, & \text{Otherwise.} \end{cases} \quad (5)$$

Given the assumption that  $S_{i,k}^m < S_{i',k}^m$  for  $k = 1, 2, \dots, K$ , we have  $S_m^y(1, j) < S_m^{y'}(1, j)$ . Then we could get  $A$  is a positive define matrix easily using the definition of positive define matrixs. Regarding  $A$  and  $B_0$  are both semi-positive define matrix, we have following statement using **Oppenheim’s inequality**:

$$\det(A \circ B_0) = \det(B_1) \geq \det(B_0) \prod_i^K A(i, i) = \det(B_0), \quad (6)$$

where  $A \circ B_0$  is the **Hadamard product** (element-wise product) of  $A$  and  $B_0$ . Besides,  $B_1$  is also a semi-positive define matrix according to **Schur product theorem**.

For  $i = 1, 2, \dots, K - 1$ , it is easy to construct  $A$  with similar definition like above and get the statement that  $\det(B_i) \leq \det(B_{i+1})$ . Now, combining the chain of inequality, we have:

$$\det(S_m^y) = \det(B_{K-1}) \geq \det(B_0) = \det(S_m^{y'}). \quad (7)$$

Using Eq. (2)(7), the property holds easily.

## A-II: Supernet Structure and Search Space

In this section we give the detailed supernet structer and space of the new dimension *Split Point*.

| Input Shape       | Operators                             | Channels   | Repeat | Stride |
|-------------------|---------------------------------------|------------|--------|--------|
| $224^2 \times 3$  | $3 \times 3$ Conv                     | 16         | 1      | 2      |
| $112^2 \times 16$ | $3 \times 3$ Depthwise Separable Conv | 16         | 1      | 2      |
| $56^2 \times 16$  | MBCConv / SkipConnect                 | 24         | 4      | 2      |
| $28^2 \times 24$  | MBCConv / SkipConnect                 | 40         | 4      | 2      |
| $14^2 \times 40$  | MBCConv / SkipConnect                 | 80         | 4      | 1      |
| $14^2 \times 80$  | MBCConv / SkipConnect                 | 112        | 4      | 2      |
| $7^2 \times 112$  | MBCConv / SkipConnect                 | 160        | 4      | 1      |
| $7^2 \times 160$  | $1 \times 1$ Conv                     | 960        | 1      | 1      |
| $7^2 \times 960$  | Global Avg. Pooling                   | 960        | 1      | -      |
| 960               | $1 \times 1$ Conv                     | 1,280      | 1      | 1      |
| 1,280             | Fully Connect                         | 1,000      | 1      | -      |
| Split Point       |                                       | (9, 20, 1) |        |        |

Table 1. The structure of the supernet. The "MBCConv" contains 6 inverted bottleneck residual block MBCConv [1] ( kernel sizes of {3,5,7}) with the squeeze and excitation module (expansion rates {4,6}). The "Repeat" represents the maximum number of repeated blocks in a group. The "Stride" indicates the convolutional stride of the first block in each repeated group. (9, 20, 1) means space starts from 9 to 20 with a step of 1.

## Appendix B

In appendix B, we show the detailed evolution algorithm, with the detailed algorithm of  $K$ -path evolution search below. Specific steps of Crossover, Mutation are presented in Section 3.4.

---

**Algorithm 1** K-Path Evolution Search

---

**Input:**

Shrunk search space  $\tilde{\mathcal{S}}$ , weights  $W_{\tilde{\mathcal{S}}}$ , population size  $P$ , resources constraints  $C$ , number of generation iteration  $\mathcal{T}$ , validation dataset  $D_{\text{val}}$ , training dataset  $D_{\text{train}}$ , Mutation probability of split point  $P_s$ , Mutation probability of layer combination  $P_m$ .

**Output:** The most promising ensemble architecture  $\mathcal{A}^*$ .

- 1:  $G_{(0)} :=$  Random sample  $P$  ensemble architectures  $\{\mathcal{A}_1, \mathcal{A}_2, \dots, \mathcal{A}_P\}$  from  $\tilde{\mathcal{S}}$  with constrain  $C$ ;
  - 2: **while** search step  $t \in (0, \mathcal{T})$  **do**
  - 3:   **while**  $\mathcal{A}_i \in G_{(t)}$  **do**
  - 4:     Recalculate the statistics of BN on  $D_{\text{train}}$ ;
  - 5:     Obtain the accuracy of  $\Phi(\cdot; \mathcal{A}_i, W_{\tilde{\mathcal{S}}})$  on  $D_{\text{val}}$ .
  - 6:   **end while**
  - 7:    $G_{\text{topk}} :=$  the Top  $K$  candidates by accuracy order;
  - 8:    $G_{\text{crossover}} :=$  Crossover( $G_{\text{topk}}, \tilde{\mathcal{S}}, C$ );
  - 9:    $G_{\text{mutation}} :=$  Mutation( $G_{\text{topk}}, P_s, P_m, \tilde{\mathcal{S}}, C$ );
  - 10:  $G_{(t+1)} = G_{\text{crossover}} \cup G_{\text{mutation}}$
  - 11: **end while**
- 

## References

- [1] Mark Sandler, Andrew Howard, Menglong Zhu, Andrey Zhmoginov, and Liang-Chieh Chen. Mobilenetv2: Inverted residuals and linear bottlenecks. In *CVPR*, 2018.
